# Supplementary material
Source: PubMed Central journal article supplement (PMC2224207)
Supplement: pnas_0710780104_4.pdf [file pnas_0710780104_4.pdf]

**LS24****LS40****LS50**

oo sg 40 50 sc bs

oo sg 24 50 sc bs

oo sg 24 40 sc bs

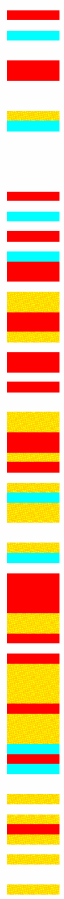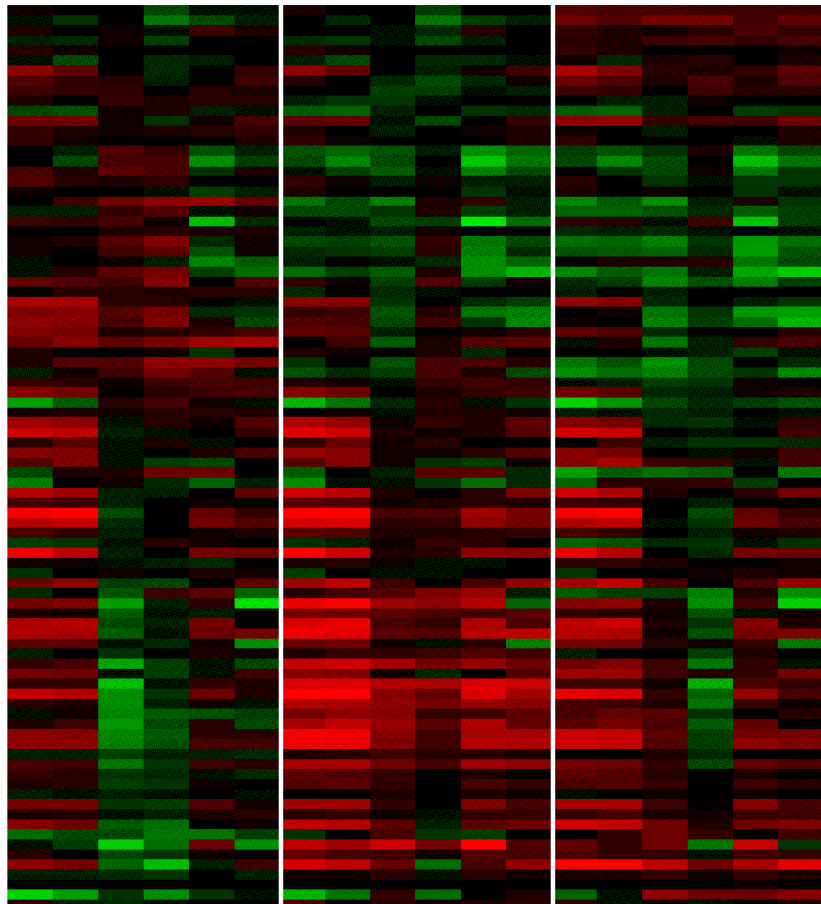

- PY05070
- PY03410
- PY04302
- PY06048
- PY04458
- PY02143
- PY07133
- PY01286
- PY06630
- PY00526
- PY02148
- PY05051
- PY05838
- PY03170
- PY01268
- PY01222
- PY04329
- PY03802
- PY00378
- PY02063
- PY06052
- PY00301
- PY00073
- PY01714
- PY06092
- PY00033
- PY01304
- PY00469
- PY00546
- PY00855
- PY06083
- PY00783
- PY03738
- PY01732
- PY00189
- PY00451
- PY01242
- PY04608
- PY04917
- PY05305
- PY02956
- PY05383
- PY04957
- PY00101
- PY06507
- PY01557
- PY04232
- PY02398
- PY01938
- PY04698
- PY04076
- PY04300
- PY06767
- PY02359
- PY05772
- PY01053
- PY01755
- PY03977
- PY04351
- PY04190
- PY02934
- PY00109
- PY06253
- PY00306
- PY01032
- PY03772
- PY06176
- PY03078
- PY02085
- PY03034
- PY02332
- PY02959
- PY04402
- PY00480
- PY04103
- PY00802
- PY00044
- PY06065
- PY06030
- PY00067
- PY03484
- PY00152
- PY00357
- PY03212
- PY02877
- PY01797
- PY02985
- PY01140
