# Supplementary material
Source: PubMed Central journal article supplement (PMC2224207)

LS24

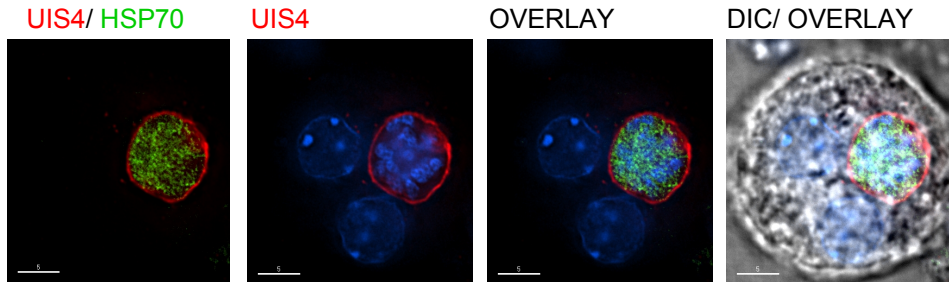

LS40

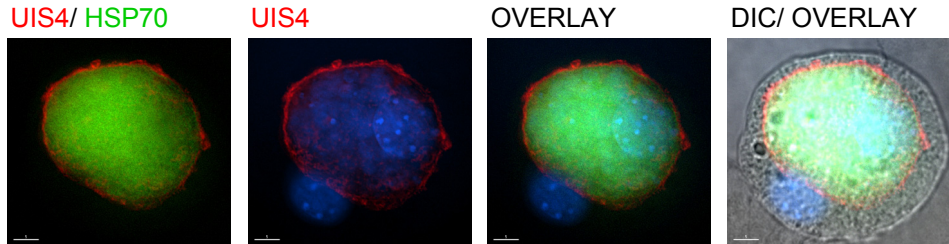

LS50

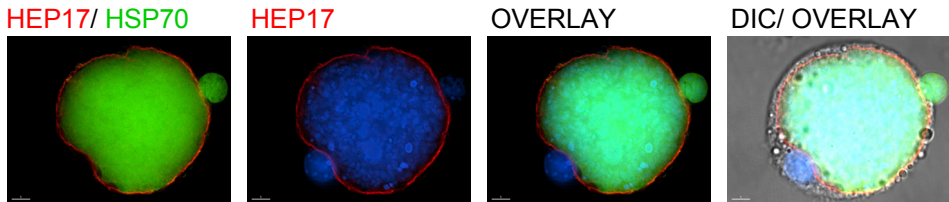

Supplement: pnas_0710780104_1.pdf [file pnas_0710780104_1.pdf]

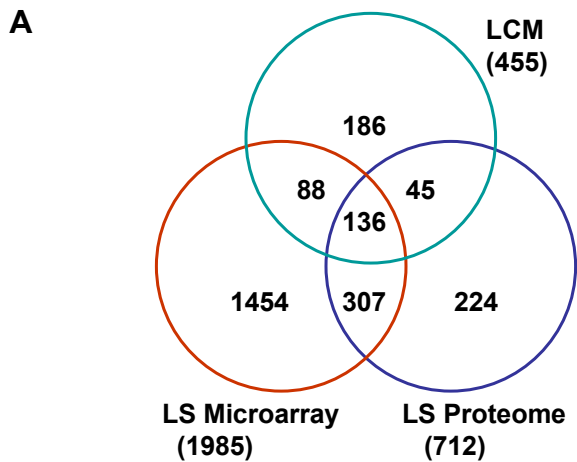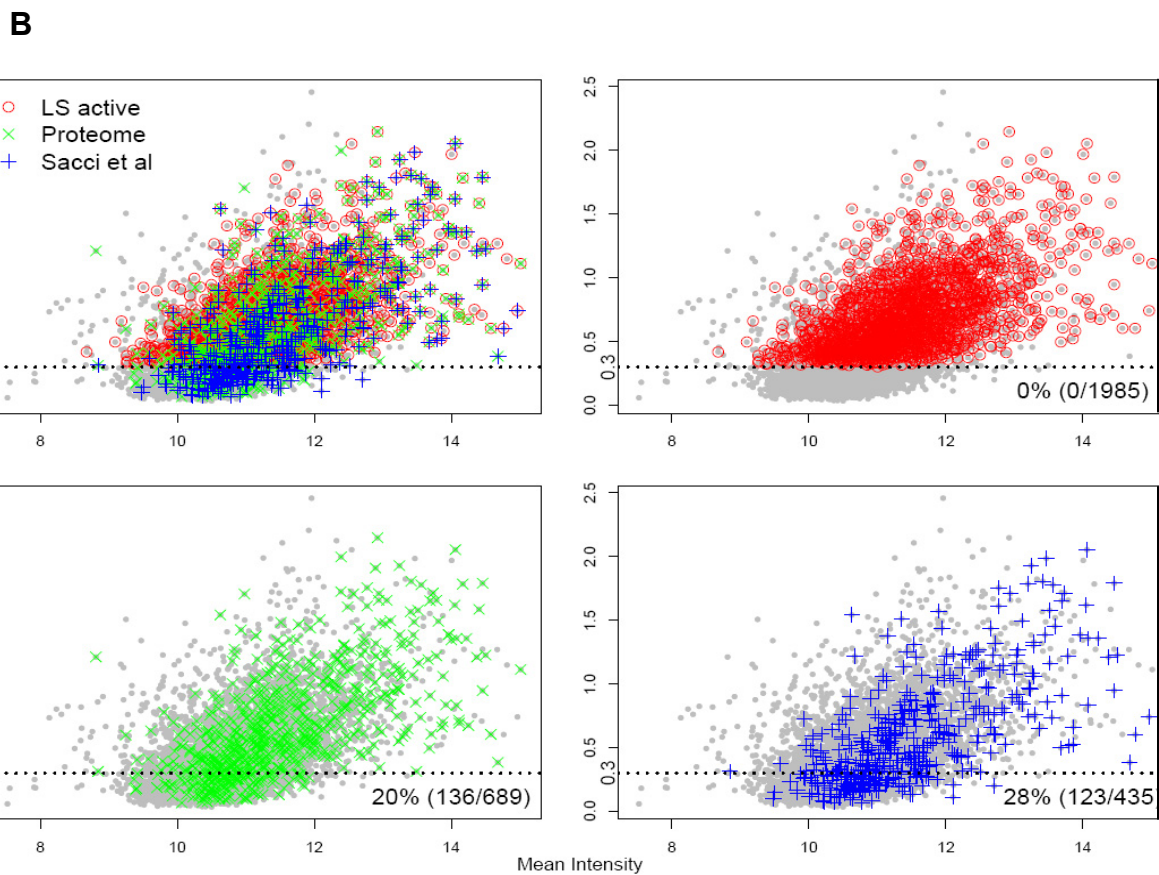

Supplement: pnas_0710780104_2.pdf [file pnas_0710780104_2.pdf]

# LS Transcriptome

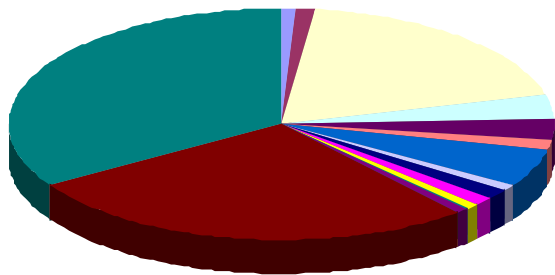

# LS Proteome

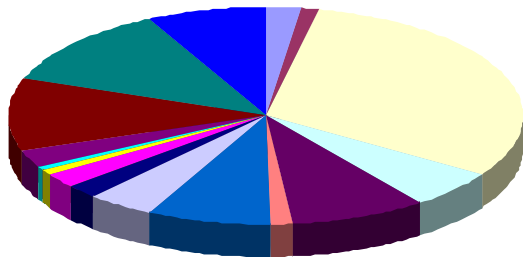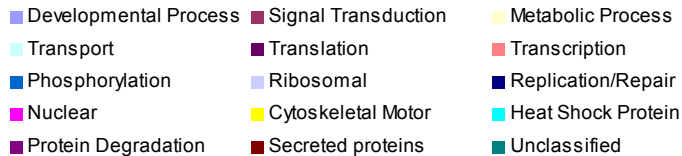

Supplement: pnas_0710780104_3.pdf [file pnas_0710780104_3.pdf]
